# Supplementary material for: Bonding in phosphorus ylides: topological analysis of experimental charge density distribution in triphenylphosphonium benzylide †
Source: Royal Society of Chemistry journal article supplement (doi:10.1039/a908099f), 2000-01-01
Supplement: a908099f.doc [file a908099f.doc]

**Supplementary data**

**Bonding in phosphorus ylides: topological analysis of experimental charge density distribution in triphenylphosphonium benzylide**

**Dmitrii S. Yufit*, Judith A.K.Howard and Matthew G. Davidson**

*Department of Chemistry, University of Durham, Durham, UK DH1 3LE*

**Table 1S** Atomic coordinates (×105) and *U*iso or *U*equiv (Å2 × 104)

| Atom | *x* | *y* | *z* | *U*eq |
| --- | --- | --- | --- | --- |
| P(1) | 0.04554(4) | 0.76988(3) | 0.05950(1) | 0.012 |
| C(1) | 0.06384(4) | 0.89899(4) | 0.10992(2) | 0.015 |
| C(2) | 0.18974(4) | 0.93950(4) | 0.14950(2) | 0.014 |
| C(3) | 0.31991(5) | 0.87401(4) | 0.15305(2) | 0.017 |
| C(4) | 0.43665(5) | 0.91520(5) | 0.19436(3) | 0.020 |
| C(5) | 0.43039(5) | 1.02369(5) | 0.23386(3) | 0.021 |
| C(6) | 0.30467(6) | 1.09163(4) | 0.22952(2) | 0.020 |
| C(7) | 0.18770(5) | 1.05153(4) | 0.18807(2) | 0.017 |
| C(8) | 0.11775(4) | 0.63552(4) | 0.10497(2) | 0.014 |
| C(9) | 0.21405(4) | 0.55666(4) | 0.07213(2) | 0.017 |
| C(10) | 0.26952(5) | 0.45708(4) | 0.11075(3) | 0.022 |
| C(11) | 0.22676(6) | 0.43432(5) | 0.18124(3) | 0.023 |
| C(12) | 0.13135(6) | 0.51250(5) | 0.21454(3) | 0.022 |
| C(13) | 0.07895(5) | 0.61414(4) | 0.17690(2) | 0.019 |
| C(14) | 0.12712(4) | 0.76990(4) | -0.02922(2) | 0.013 |
| C(15) | 0.09672(5) | 0.68125(4) | -0.08233(2) | 0.019 |
| C(16) | 0.16591(6) | 0.68441(5) | -0.14848(3) | 0.023 |
| C(17) | 0.26458(5) | 0.77637(5) | -0.16202(2) | 0.022 |
| C(18) | 0.29272(5) | 0.86608(5) | -0.11002(3) | 0.019 |
| C(19) | 0.22426(4) | 0.86264(4) | -0.04370(2) | 0.015 |
| C(20) | -0.14255(4) | 0.74839(3) | 0.04128(2) | 0.014 |
| C(21) | -0.22451(5) | 0.66485(4) | 0.07958(2) | 0.018 |
| C(22) | -0.37182(5) | 0.66110(5) | 0.06786(3) | 0.022 |
| C(23) | -0.43729(4) | 0.74077(5) | 0.01805(3) | 0.021 |
| C(24) | -0.35560(5) | 0.82296(4) | -0.02100(3) | 0.020 |
| C(25) | -0.20834(4) | 0.82615(4) | -0.00981(2) | 0.016 |
| H(1) | -0.02641 | 0.95994 | 0.10741 | 0.034 |
| H(3) | 0.33081 | 0.79137 | 0.12148 | 0.027 |
| H(4) | 0.53356 | 0.86174 | 0.19521 | 0.035 |
| H(5) | 0.52006 | 1.05508 | 0.26698 | 0.035 |
| H(6) | 0.29733 | 1.17666 | 0.25910 | 0.035 |
| H(7) | 0.09461 | 1.10966 | 0.18473 | 0.025 |
| H(9) | 0.24571 | 0.57224 | 0.01672 | 0.028 |
| H(10) | 0.34378 | 0.39658 | 0.08481 | 0.029 |
| H(11) | 0.26898 | 0.35558 | 0.21003 | 0.043 |
| H(12) | 0.09626 | 0.49349 | 0.26899 | 0.041 |
| H(13) | 0.01150 | 0.67887 | 0.20410 | 0.032 |
| H(15) | 0.01917 | 0.61085 | -0.07178 | 0.032 |
| H(16) | 0.14506 | 0.61467 | -0.18905 | 0.026 |
| H(17) | 0.32066 | 0.77928 | -0.21266 | 0.035 |
| H(18) | 0.37013 | 0.93699 | -0.11970 | 0.029 |
| H(19) | 0.24554 | 0.93110 | -0.00242 | 0.021 |
| H(21) | -0.17593 | 0.60177 | 0.11813 | 0.025 |
| H(22) | -0.42934 | 0.59193 | 0.09711 | 0.038 |
| H(23) | -0.55139 | 0.73806 | 0.00820 | 0.028 |
| H(24) | -0.40128 | 0.88231 | -0.06247 | 0.029 |
| H(25) | -0.14316 | 0.88795 | -0.04055 | 0.025 |

**Table 2S** Anisotropic displacement parameters (Å2 × 104).

| Atom | *U*11 | *U*22 | *U*33 | *U*12 | *U*13 | *U*23 |
| --- | --- | --- | --- | --- | --- | --- |
| P(1) | 0.01180(3) | 0.01180(4) | 0.01136(4) | 0.00022(3) | 0.00103(2) | -.00022(3) |
| C(1) | 0.0147(1) | 0.0145(1) | 0.0151(1) | 0.0017(1) | -0.0002(1) | -0.0027(1) |
| C(2) | 0.0151(1) | 0.0136(1) | 0.0124(1) | -0.0001(1) | 0.0009(1) | -0.0008(1) |
| C(3) | 0.0149(1) | 0.0168(2) | 0.0184(2) | 0.0003(1) | -0.0002(1) | -0.0020(1) |
| C(4) | 0.0160(2) | 0.0220(2) | 0.0230(2) | -0.0016(2) | -0.0025(1) | 0.0001(2) |
| C(5) | 0.0213(2) | 0.0226(2) | 0.0201(2) | -0.0058(2) | -0.0036(1) | -0.0002(2) |
| C(6) | 0.0254(2) | 0.0170(2) | 0.0161(2) | -0.0044(2) | -0.0012(1) | -0.0019(1) |
| C(7) | 0.0204(2) | 0.0148(2) | 0.0145(1) | -0.0003(1) | 0.0004(1) | -0.0022(1) |
| C(8) | 0.0145(1) | 0.0136(1) | 0.0139(1) | 0.0010(1) | 0.0005(1) | 0.0007(1) |
| C(9) | 0.0178(2) | 0.0142(2) | 0.0195(2) | 0.0024(1) | 0.0011(1) | -0.0011(1) |
| C(10) | 0.0236(2) | 0.0151(2) | 0.0269(2) | 0.0050(1) | -0.0020(2) | -0.0009(2) |
| C(11) | 0.0271(2) | 0.0171(2) | 0.0252(2) | 0.0034(2) | -0.0067(2) | 0.0039(2) |
| C(12) | 0.0267(2) | 0.0227(2) | 0.0180(2) | 0.0030(2) | -0.0029(2) | 0.0062(2) |
| C(13) | 0.0207(2) | 0.0209(2) | 0.0144(1) | 0.0040(1) | 0.0007(1) | 0.0034(1) |
| C(14) | 0.0139(1) | 0.0138(1) | 0.0124(1) | -0.0011(1) | 0.0019(1) | -0.0007(1) |
| C(15) | 0.0228(2) | 0.0197(2) | 0.0149(2) | -0.0056(1) | 0.0035(1) | -0.0040(1) |
| C(16) | 0.0294(2) | 0.0247(2) | 0.0149(2) | -0.0038(2) | 0.0051(2) | -0.0052(2) |
| C(17) | 0.0242(2) | 0.0264(2) | 0.0146(1) | -0.0001(2) | 0.0061(1) | 0.0002(2) |
| C(18) | 0.0190(2) | 0.0219(2) | 0.0168(2) | -0.0027(1) | 0.0042(1) | 0.0030(1) |
| C(19) | 0.0159(1) | 0.0148(1) | 0.0148(1) | -0.0018(1) | 0.0020(1) | 0.0008(1) |
| C(20) | 0.0126(1) | 0.0144(2) | 0.0138(1) | -0.0001(1) | 0.0007(1) | 0.0008(1) |
| C(21) | 0.0146(1) | 0.0224(2) | 0.0174(2) | -0.0025(1) | 0.0013(1) | 0.0053(1) |
| C(22) | 0.0146(2) | 0.0305(2) | 0.0217(2) | -0.0041(2) | 0.0028(1) | 0.0049(2) |
| C(23) | 0.0130(1) | 0.0274(2) | 0.0236(2) | 0.0011(1) | 0.0012(1) | 0.0005(2) |
| C(24) | 0.0152(2) | 0.0194(2) | 0.0244(2) | 0.0027(1) | -0.0023(1) | 0.0016(2) |
| C(25) | 0.0147(1) | 0.0150(1) | 0.0190(2) | 0.0006(1) | -0.0008(1) | 0.0024(1) |

**Table S3** Local coordination system, used in XD refinement of **1**

| Atom | Atom 1 | Ax.1 | Atom 2 | Ax. 2 | Atom | Atom 1 | Ax. 1 | Atom 2 | Ax. 2 |
| --- | --- | --- | --- | --- | --- | --- | --- | --- | --- |
| P(1) | C(1) | Z | C(20) | Y | C(24) | C(25) | X | C(23) | Y |
| C(1) | P(1) | X | C(2) | Y | C(25) | C(20) | X | C(24) | Y |
| C(2) | C(3) | X | C(7) | Y | H(1) | C(1) | X | C(2) | Y |
| C(3) | C(4) | X | C(2) | Y | H(3) | C(3) | X | C(2) | Y |
| C(4) | C(5) | X | C(3) | Y | H(4) | C(4) | X | C(3) | Y |
| C(5) | C(6) | X | C(7) | Y | H(5) | C(5) | X | C(4) | Y |
| C(6) | C(7) | X | C(5) | Y | H(6) | C(6) | X | C(5) | Y |
| C(7) | C(2) | X | C(6) | Y | H(7) | C(7) | X | C(6) | Y |
| C(8) | C(9) | X | C(13) | Y | H(9) | C(9) | X | C(8) | Y |
| C(9) | C(10) | X | C(8) | Y | H(10) | C(10) | X | C(9) | Y |
| C(10) | C(11) | X | C(9) | Y | H(11) | C(11) | X | C(10) | Y |
| C(11) | C(12) | X | C(10) | Y | H(12) | C(12) | X | C(11) | Y |
| C(12) | C(13) | X | C(11) | Y | H(13) | C(13) | X | C(12) | Y |
| C(13) | C(8) | X | C(12) | Y | H(15) | C(15) | X | C(14) | Y |
| C(14) | C(15) | X | C(19) | Y | H(16) | C(16) | X | C(15) | Y |
| C(15) | C(16) | X | C(14) | Y | H(17) | C(17) | X | C(16) | Y |
| C(16) | C(17) | X | C(15) | Y | H(18) | C(18) | X | C(17) | Y |
| C(17) | C(18) | X | C(16) | Y | H(19) | C(19) | X | C(18) | Y |
| C(18) | C(19) | X | C(17) | Y | H(21) | C(21) | X | C(20) | Y |
| C(19) | C(14) | X | C(18) | Y | H(22) | C(22) | X | C(21) | Y |
| C(20) | C(21) | X | C(25) | Y | H(23) | C(23) | X | C(22) | Y |
| C(21) | C(22) | X | C(20) | Y | H(24) | C(24) | X | C(23) | Y |
| C(22) | C(23) | X | C(21) | Y | H(25) | C(25) | X | C(24) | Y |
| C(23) | C(24) | X | C(22) | Y |  |  |  |  |  |

**Table S4** Multipole population parameters for **1**

| Atom | P{v} | P{11} | P{1-1} | P{10} | Atom | P{v} | P{11} | P{1-1} | P{10} |
| --- | --- | --- | --- | --- | --- | --- | --- | --- | --- |
| P(1) | 4.51(6) | 0.01(1) | -0.02(1) | 0.02(1) | C(24) | 4.16(3) | -0.04(2) | 0.04(2) | -0.03(1) |
| C(1) | 4.41(3) | 0.04(2) | -0.01(2) | 0.04(1) | C(25) | 4.22(3) | 0.01(2) | -0.04(2) | -0.01(1) |
| C(2) | 4.11(3) | 0.04(2) | -0.01(2) | -0.03(1) | H(1) | 0.93(2) | 0.17(1) | 0.00(0) | 0.00(0) |
| C(3) | 4.21(3) | 0.03(2) | 0.01(2) | 0.02(1) | H(3) | 0.86(2) | 0.16(1) | 0.00(0) | 0.00(0) |
| C(4) | 4.20(3) | 0.06(2) | 0.07(2) | 0.01(1) | H(4) | 0.87(2) | 0.17(1) | 0.00(0) | 0.00(0) |
| C(5) | 4.10(3) | 0.07(2) | -0.02(2) | -0.03(1) | H(5) | 0.86(2) | 0.19(1) | 0.00(0) | 0.00(0) |
| C(6) | 4.09(3) | 0.08(2) | -0.02(2) | -0.03(1) | H(6) | 0.85(2) | 0.13(1) | 0.00(0) | 0.00(0) |
| C(7) | 4.18(3) | 0.01(2) | -0.04(2) | -0.01(1) | H(7) | 0.81(2) | 0.13(1) | 0.00(0) | 0.00(0) |
| C(8) | 4.12(3) | -0.03(2) | -0.03(2) | 0.02(1) | H(9) | 0.84(2) | 0.18(1) | 0.00(0) | 0.00(0) |
| C(9) | 4.17(3) | 0.04(2) | 0.06(2) | 0.00(1) | H(10) | 0.76(2) | 0.17(1) | 0.00(0) | 0.00(0) |
| C(10) | 4.07(3) | 0.01(3) | 0.00(2) | 0.02(2) | H(11) | 0.86(2) | 0.21(1) | 0.00(0) | 0.00(0) |
| C(11) | 4.09(3) | 0.07(3) | 0.02(2) | 0.02(2) | H(12) | 0.88(2) | 0.18(1) | 0.00(0) | 0.00(0) |
| C(12) | 4.00(3) | 0.03(2) | 0.00(2) | -0.03(2) | H(13) | 0.82(2) | 0.13(1) | 0.00(0) | 0.00(0) |
| C(13) | 4.25(3) | -0.01(2) | 0.01(2) | -0.05(1) | H(15) | 0.77(2) | 0.14(1) | 0.00(0) | 0.00(0) |
| C(14) | 4.23(3) | -0.05(2) | 0.03(2) | 0.00(1) | H(16) | 0.77(2) | 0.14(1) | 0.00(0) | 0.00(0) |
| C(15) | 4.21(3) | 0.04(2) | 0.03(2) | 0.00(1) | H(17) | 0.81(2) | 0.13(1) | 0.00(0) | 0.00(0) |
| C(16) | 4.09(3) | 0.05(2) | -0.03(2) | 0.00(2) | H(18) | 0.82(2) | 0.12(1) | 0.00(0) | 0.00(0) |
| C(17) | 4.19(3) | -0.01(2) | -0.03(2) | 0.01(2) | H(19) | 0.77(2) | 0.10(1) | 0.00(0) | 0.00(0) |
| C(18) | 4.17(3) | -0.02(2) | -0.03(2) | 0.00(1) | H(21) | 0.81(2) | 0.15(1) | 0.00(0) | 0.00(0) |
| C(19) | 4.29(3) | -0.09(2) | -0.04(2) | -0.01(1) | H(22) | 0.84(2) | 0.15(1) | 0.00(0) | 0.00(0) |
| C(20) | 4.14(3) | -0.01(2) | 0.03(2) | 0.02(1) | H(23) | 0.76(2) | 0.14(1) | 0.00(0) | 0.00(0) |
| C(21) | 4.23(3) | -0.01(2) | 0.00(2) | -0.02(1) | H(24) | 0.82(2) | 0.13(1) | 0.00(0) | 0.00(0) |
| C(22) | 4.11(3) | 0.00(2) | 0.02(2) | -0.02(2) | H(25) | 0.82(2) | 0.12(1) | 0.00(0) | 0.00(0) |
| C(23) | 4.15(3) | -0.08(2) | 0.01(2) | -0.02(2) |  |  |  |  |  |

**Table S4** (cont.)

| Atom | P{20} | P{21} | P{2-1} | P{22} | P{2-2} |
| --- | --- | --- | --- | --- | --- |
| P(1) | 0.06(1) | -0.09(1) | 0.02(1) | 0.00(1) | -0.03(1) |
| C(1) | -0.04(1) | 0.00(1) | -0.01(1) | -0.01(2) | -0.02(1) |
| C(2) | -0.27(1) | 0.00(1) | 0.05(1) | 0.01(2) | 0.00(2) |
| C(3) | -0.21(1) | 0.02(1) | 0.00(1) | 0.01(2) | 0.02(2) |
| C(4) | -0.25(1) | 0.03(2) | -0.05(1) | 0.03(2) | -0.03(2) |
| C(5) | -0.23(1) | 0.02(2) | -0.01(1) | 0.05(2) | -0.04(2) |
| C(6) | -0.27(1) | -0.05(1) | -0.01(1) | 0.02(2) | -0.01(2) |
| C(7) | -0.23(1) | -0.07(1) | 0.03(1) | -0.03(2) | -0.03(2) |
| C(8) | -0.25(1) | 0.00(1) | -0.01(1) | 0.02(2) | -0.07(2) |
| C(9) | -0.29(1) | 0.00(1) | 0.00(1) | -0.01(2) | 0.01(2) |
| C(10) | -0.28(1) | 0.01(2) | -0.02(1) | 0.02(2) | 0.01(2) |
| C(11) | -0.33(1) | 0.03(2) | 0.03(1) | 0.02(2) | -0.10(2) |
| C(12) | -0.28(1) | 0.06(2) | 0.03(1) | 0.00(2) | 0.04(2) |
| C(13) | -0.30(1) | 0.01(1) | -0.04(1) | 0.01(2) | 0.00(2) |
| C(14) | -0.27(1) | -0.05(1) | 0.02(1) | -0.02(2) | -0.03(2) |
| C(15) | -0.30(1) | -0.02(1) | 0.03(1) | 0.04(2) | -0.02(2) |
| C(16) | -0.26(1) | 0.02(2) | 0.03(1) | 0.01(2) | -0.01(2) |
| C(17) | -0.31(1) | 0.05(2) | 0.01(1) | 0.07(2) | 0.02(2) |
| C(18) | -0.29(1) | 0.03(1) | -0.01(1) | 0.02(2) | -0.02(2) |
| C(19) | -0.28(1) | -0.02(1) | -0.02(1) | -0.03(2) | -0.01(2) |
| C(20) | -0.22(1) | -0.03(1) | 0.04(1) | 0.02(2) | -0.05(2) |
| C(21) | -0.29(1) | 0.04(1) | 0.02(1) | -0.01(2) | -0.01(2) |
| C(22) | -0.27(1) | 0.07(2) | 0.04(1) | -0.05(2) | 0.00(2) |
| C(23) | -0.32(1) | 0.05(2) | -0.03(1) | 0.00(2) | -0.05(2) |
| C(24) | -0.31(1) | 0.00(1) | -0.04(1) | -0.01(2) | -0.02(2) |
| C(25) | -0.26(1) | -0.04(1) | 0.00(1) | -0.02(2) | -0.01(2) |

**Table S4** (cont.)

| Atom | P{30} | P{31} | P{3-1} | P{32} | P{3-2} | P{33} | P{3-3} |
| --- | --- | --- | --- | --- | --- | --- | --- |
| P(1) | 0.35(2) | 0.03(1) | -0.05(1) | 0.05(1) | 0.01(1) | 0.01(1) | -0.25(1) |
| C(1) | -0.01(1) | 0.08(1) | -0.01(1) | 0.00(1) | -0.04(1) | 0.23(1) | 0.11(2) |
| C(2) | -0.02(1) | -0.03(1) | -0.02(1) | 0.02(2) | -0.02(2) | 0.37(2) | -0.02(2) |
| C(3) | -0.05(1) | 0.01(1) | -0.02(1) | -0.01(1) | 0.01(1) | 0.31(2) | 0.03(2) |
| C(4) | 0.01(1) | -0.01(1) | 0.00(1) | -0.01(2) | -0.02(2) | 0.36(2) | 0.04(2) |
| C(5) | -0.02(1) | -0.02(1) | 0.05(1) | -0.01(2) | -0.01(2) | 0.35(2) | 0.00(2) |
| C(6) | 0.00(1) | -0.01(1) | 0.02(1) | -0.03(2) | -0.02(1) | 0.34(2) | 0.01(2) |
| C(7) | 0.00(1) | -0.01(1) | 0.03(1) | 0.00(1) | -0.03(1) | 0.35(2) | 0.07(2) |
| C(8) | -0.02(1) | 0.02(1) | -0.04(1) | 0.00(1) | -0.03(2) | 0.29(2) | -0.01(2) |
| C(9) | 0.00(1) | -0.01(1) | 0.00(1) | 0.02(1) | 0.00(1) | 0.41(2) | 0.01(2) |
| C(10) | 0.02(1) | 0.00(1) | 0.01(1) | -0.01(2) | -0.03(2) | 0.35(2) | 0.01(2) |
| C(11) | -0.01(2) | 0.01(2) | 0.04(1) | -0.02(2) | 0.02(2) | 0.41(2) | 0.00(2) |
| C(12) | 0.00(1) | 0.00(1) | 0.00(1) | 0.08(2) | 0.01(2) | 0.33(2) | -0.01(2) |
| C(13) | 0.02(1) | 0.01(1) | 0.00(1) | 0.02(1) | 0.03(1) | 0.41(2) | 0.03(2) |
| C(14) | -0.03(1) | -0.04(1) | -0.04(1) | 0.00(1) | -0.02(1) | 0.29(2) | -0.02(2) |
| C(15) | 0.01(1) | 0.00(1) | 0.01(1) | -0.03(1) | -0.01(1) | 0.44(2) | 0.01(2) |
| C(16) | 0.00(2) | 0.01(1) | -0.02(1) | 0.02(2) | -0.01(2) | 0.32(2) | 0.05(2) |
| C(17) | 0.02(1) | 0.02(1) | 0.01(1) | -0.02(2) | 0.02(2) | 0.39(2) | -0.02(2) |
| C(18) | 0.00(1) | 0.03(1) | -0.04(1) | 0.02(2) | -0.02(1) | 0.32(2) | 0.00(2) |
| C(19) | 0.03(1) | 0.02(1) | 0.02(1) | 0.01(1) | 0.01(1) | 0.40(2) | -0.02(2) |
| C(20) | -0.01(1) | 0.00(1) | -0.04(1) | 0.02(1) | -0.03(2) | 0.26(2) | -0.03(2) |
| C(21) | -0.01(1) | -0.01(1) | 0.00(1) | 0.02(1) | -0.01(1) | 0.40(2) | -0.03(2) |
| C(22) | -0.01(1) | -0.02(1) | 0.00(1) | 0.04(2) | -0.01(1) | 0.37(2) | 0.01(2) |
| C(23) | -0.01(1) | 0.06(1) | 0.04(1) | 0.01(2) | 0.03(2) | 0.38(2) | -0.01(2) |
| C(24) | 0.02(1) | 0.00(1) | -0.02(1) | 0.02(2) | -0.03(1) | 0.36(2) | -0.07(2) |
| C(25) | 0.01(1) | 0.03(1) | 0.00(1) | -0.02(1) | 0.00(1) | 0.40(2) | -0.02(2) |

| atom | P{40} | P{41} | P{4-1} | P{42} | P{4-2} | P{43} | P{4-3} | P{44} | P{4-4} |
| --- | --- | --- | --- | --- | --- | --- | --- | --- | --- |
| P(1) | 0.02(1) | -0.01(1) | 0.03(1) | 0.07(1) | -0.03(1) | -0.03(1) | 0.16(1) | 0.07(1) | -0.01(1) |

(*a*) (*b*) (*c*)

(*d*) (*e*) (*f*)

(*g*)

**Fig. S1** Residual maps in the planes (*a*) P(1)C(1)C(2); (*b*) P(1)C(1)C(20); (*c*) P(1)C(8)C(14); (*d*) C(2)C(5)C(7); (*e*) C(8)C(11)C(9); (*f*) C(14)C(17)C(19); (*g*) C(20)C(23)C(25). Contour intervals are 0.05 e Å-3.
